# Supplementary material
Source: Springer Nature journal article supplement (https://www.springermedizin.de/resource/supplementary/12885_2010_2874_MOESM6_ESM.pdf/9462200)

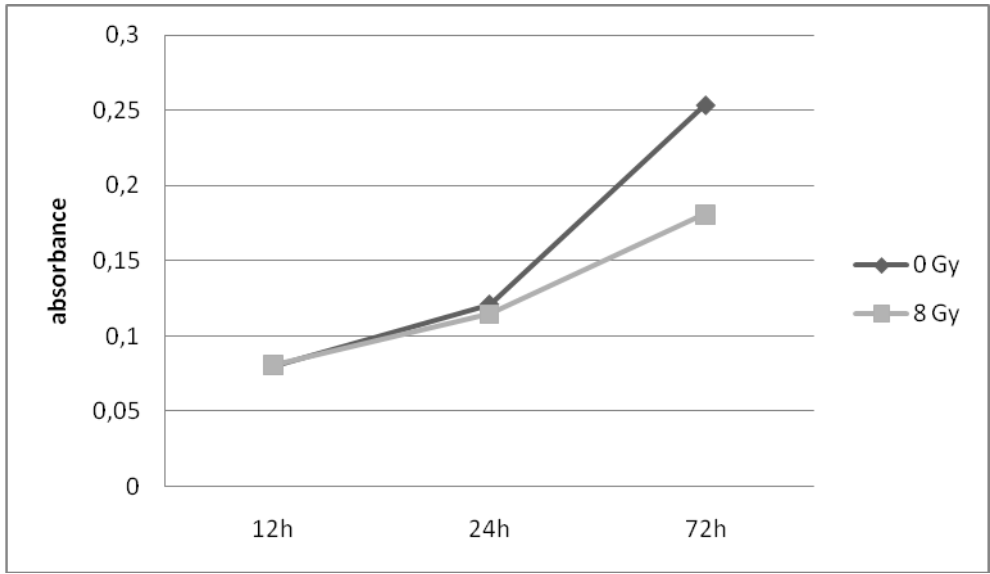

A

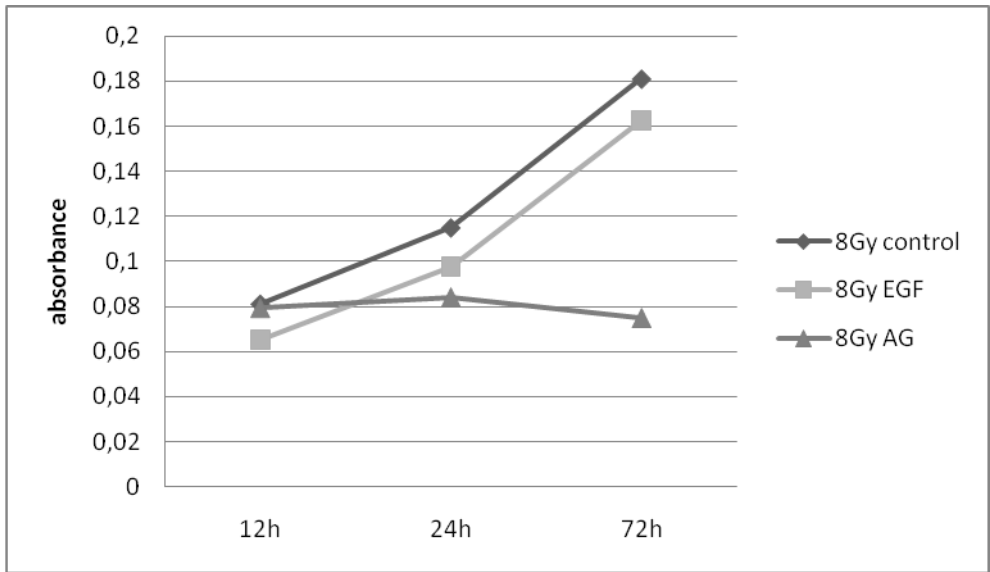

B

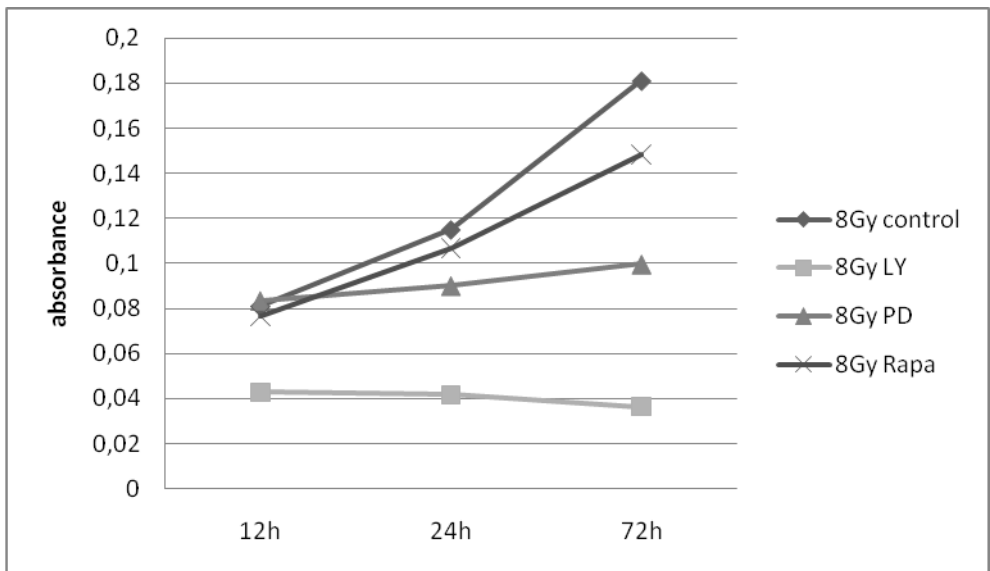

C

Supplement: MOESM6 [file 9462200]
